# Supplementary material for: Catalyst- and excess reagent recycling in aza-Michael additions
Source: Royal Society of Chemistry journal article supplement (doi:10.1039/d3ob02073h), 2024-01-01
Supplement: d3ob02073h1.pdf [file d3ob02073h1.pdf]

## Electronic Supplementary Information

### Catalyst- and excess reagent recycling in *aza*-Michael additions

Lilla Maksó,<sup>a</sup> Boglárka Szele,<sup>a</sup> Dávid Ispán,<sup>a</sup> Ágnes Gömöröy<sup>b</sup>, Sándor Mahó<sup>c</sup>, Rita Skoda-Földes<sup>a\*</sup>

<sup>a</sup>*University of Pannonia, Department of Organic Chemistry, Egyetem u. 10. (P.O.Box 158) H-8200 Veszprém, Hungary*

<sup>b</sup>*Hungarian Research Network, Research Centre for Natural Sciences, Magyar tudósok körútja 2. H-1117 Budapest, Hungary*

<sup>c</sup>*Chemical Works of Gedeon Richter Plc., 1103 Budapest, Gyömrői út 19-21; Hungary*

Corresponding author: *Rita Skoda-Földes, University of Pannonia, Department of Organic Chemistry, Egyetem u. 8. (P.O.Box 158) H-8200 Veszprém, Hungary*

*skodane.foldes.rita@mk.uni-pannon.hu*

### Contents

|                                                                 |     |
|-----------------------------------------------------------------|-----|
| Supplementary data                                              | S1  |
| Characterisation of the products                                | S5  |
| <sup>1</sup> H- and <sup>13</sup> C NMR spectra of the products | S9  |
| References                                                      | S24 |

## Supplementary data

**Table S1** Leaching of the components of the *n*-Bu-TMG/imidazole/CO<sub>2</sub> mixture<sup>a</sup>

| entry | imidazole ( <b>2a</b> )<br>(mmol) | <i>n</i> -Bu-TMG<br>(mmol) | leaching  |                  |
|-------|-----------------------------------|----------------------------|-----------|------------------|
|       |                                   |                            | imidazole | <i>n</i> -Bu-TMG |
| 1     | 0.5                               | 0.5                        | yes       | yes              |
| 2     | 0.5                               | 0.75                       | no        | yes              |
| 3     | 0.5                               | 1                          | no        | yes              |

<sup>a</sup> 4h, rt, CO<sub>2</sub> bubbling, then extraction with 1.2 ml ethyl acetate, leaching determined by GC-MS detection of the extract.

**Table S2** Leaching of the components of the *n*-Bu-TMG/[bmim][BF<sub>4</sub>]/CO<sub>2</sub> mixture<sup>a</sup>

| entry | <i>n</i> -Bu-TMG<br>(mmol) | [bmim][BF <sub>4</sub> ]<br>(mmol) | leaching<br><i>n</i> -Bu-TMG |
|-------|----------------------------|------------------------------------|------------------------------|
| 1     | 0.75                       | 0.75                               | yes                          |
| 2     | 0.75                       | 1                                  | no                           |
| 3     | 0.75                       | 1.5                                | no                           |

<sup>a</sup> 4h, rt, CO<sub>2</sub> bubbling, then extraction with 1.2 ml ethyl acetate, leaching determined by GC-MS detection of the extract.

**Table S3** Calculation of E-factors of the reaction of 16-DHP (**1**) and imidazole (**2a**)

|                                                                      | after run 1 | after run 2 | after run 3 | after run 4 | after run 5 |
|----------------------------------------------------------------------|-------------|-------------|-------------|-------------|-------------|
| steroid <b>1</b> (mg) <sup>a</sup>                                   | 31.4        | 62.8        | 94.2        | 125.6       | 157         |
| imidazole <b>2a</b> (mg) <sup>a</sup>                                | 34.04       | 40.848      | 47.656      | 54.464      | 61.272      |
| [bmim][BF <sub>4</sub> ] (recycled) (mg) <sup>a</sup>                | 340         | 340         | 340         | 340         | 340         |
| <i>n</i> -Bu-TMG (recycled) (mg) <sup>a</sup>                        | 129         | 129         | 129         | 129         | 129         |
| Σ starting material (mg) <sup>a</sup>                                | 534.44      | 572.648     | 610.856     | 649.064     | 687.272     |
| yield (%)                                                            | 96          | 95          | 90          | 93          | 94          |
| product <b>3a</b> (mg) <sup>a</sup>                                  | 36.68       | 72.98       | 107.37      | 142.90      | 178.82      |
| solvent for extraction (mg) <sup>a,b</sup>                           | 594.68      | 1189.35     | 1784.03     | 2378.70     | 2973.38     |
| Σ (starting material and solvent <sup>b</sup> )<br>(mg) <sup>a</sup> | 1129.12     | 1762.00     | 2394.88     | 3027.76     | 3660.65     |
| E-factor                                                             | 29.78       | 23.14       | 21.31       | 20.19       | 19.47       |

<sup>a</sup> cumulative values, <sup>b</sup> assuming 85% recycle of the solvent

**Table S4** Aza-Michael additions with other base catalysts

| Entry | Nucleophile                          | Base             | pKa <sup>b</sup><br>(nucleophile) | pKa <sup>b</sup><br>(base) | Product   | Yield<br>(%) <sup>d</sup> |
|-------|--------------------------------------|------------------|-----------------------------------|----------------------------|-----------|---------------------------|
| 1     | imidazole ( <b>2a</b> )              | <i>n</i> -Bu-TMG | 15.07                             |                            | <b>3a</b> | 96                        |
| 2     |                                      | <i>t</i> -Bu-TMG |                                   | (23.35) <sup>c</sup>       |           | 73                        |
| 3     |                                      | TBD              |                                   | 26.02                      |           | 67                        |
| 4     |                                      | DABCO            |                                   | 18.29                      |           | traces                    |
| 5     | pyrazole ( <b>2b</b> )               | <i>n</i> -Bu-TMG | 9.1                               |                            | <b>3b</b> | 76                        |
| 6     |                                      | <i>t</i> -Bu-TMG |                                   | (23.35) <sup>c</sup>       |           | 62                        |
| 7     |                                      | DABCO            |                                   | 18.29                      |           | 22                        |
| 8     | 1,2,4-triazole ( <b>2c</b> )         | <i>n</i> -Bu-TMG |                                   |                            | <b>3c</b> | 87                        |
| 9     |                                      | DABCO            |                                   | 18.29                      |           | 65                        |
| 10    | indazole ( <b>2f</b> )               | <i>n</i> -Bu-TMG | 7.61                              |                            | <b>3f</b> | 88                        |
| 11    |                                      | MTBD             |                                   | 25.47                      |           | 79                        |
| 12    |                                      |                  |                                   |                            |           | 75 <sup>d</sup>           |
| 13    | indole ( <b>2g</b> )                 | <i>n</i> -Bu-TMG |                                   |                            | <b>3g</b> | 55                        |
| 14    |                                      | MTBD             |                                   | 25.47                      |           | 55                        |
| 15    |                                      |                  |                                   |                            |           | 51 <sup>d</sup>           |
| 16    | 1,2,3-benzotriazole<br>( <b>2h</b> ) | <i>n</i> -Bu-TMG | 6.89                              |                            | <b>3i</b> | -                         |
| 17    |                                      | <i>t</i> -Bu-TMG |                                   | (23.35) <sup>c</sup>       |           | -                         |
| 18    |                                      | DABCO            |                                   | 18.29                      |           | -                         |

<sup>a</sup>Reaction conditions: 0.1 mmol of substrate (**1**) in 1.5 mmol [bmim][BF<sub>4</sub>] and 0.75 mmol base, substrate (**1**)/nucleophile (**2**) = 1/5; 65°C, 8 h, Ar atmosphere; <sup>b</sup> basicity in MeCN [1]; <sup>c</sup> basicity of TMG, very similar basicities were reported for TMG (14.0) and *t*-Bu-TMG (13.3) in 50% aqueous ethanol [2]; <sup>d</sup> 2<sup>nd</sup> run, conditions: 0.1 mmol of substrate (**1**) and 0.1 mmol nucleophile (added to the recycled mixture obtained via the removal of CO<sub>2</sub>), 65°C, 8 h, Ar atmosphere.

**Table S5** Acid-base properties of some *N*-heterocycles

| <i>N</i> -heterocycle                | $pK_a$ (N-H) <sup>a</sup> | <i>N</i> parameter<br>(nucleophilicity) <sup>b</sup> | <i>N</i> of the anion <sup>b</sup> |
|--------------------------------------|---------------------------|------------------------------------------------------|------------------------------------|
| imidazole ( <b>2a</b> )              | 18.3 (H <sub>2</sub> O)   | 11.58 (DMSO)<br>11.47 (MeCN)                         | 21.09 (DMSO)                       |
| benzimidazole ( <b>2e</b> )          | 16.8 (H <sub>2</sub> O)   | 10.50 (DMSO)                                         | 19.13 (DMSO)                       |
| 1,2,3-benzotriazole<br>( <b>2h</b> ) | 11.92 (H <sub>2</sub> O)  | 7.69 (MeCN)                                          | 16.29 (DMSO)                       |

<sup>a</sup> ref. [3], <sup>b</sup> ref. [4]

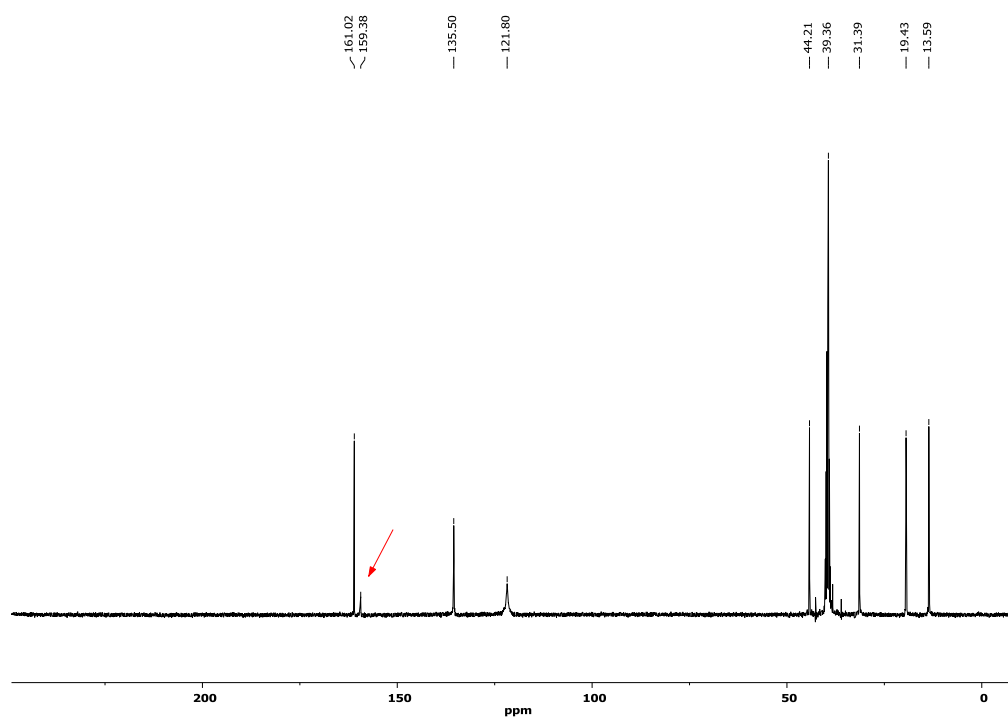

Figure S1. <sup>13</sup>C NMR spectrum of the *n*-Bu-TMG/imidazole (1/1) + CO<sub>2</sub> system in DMSO-d<sub>6</sub> (red arrow: signal of carbamate)

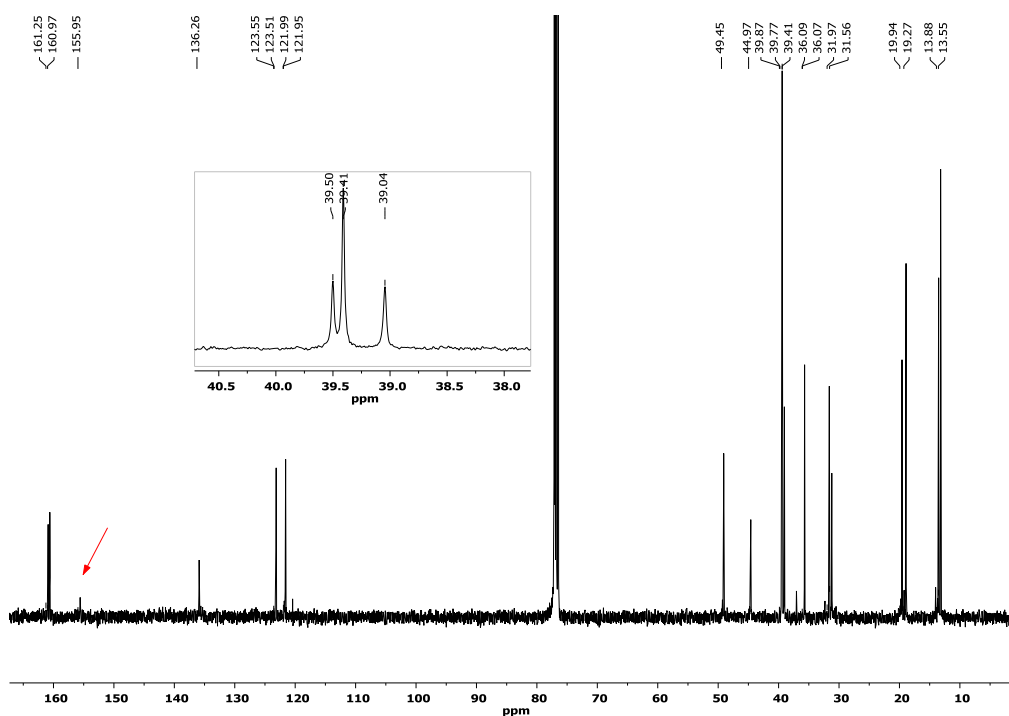

Figure S2.  $^{13}\text{C}$  NMR spectrum of the *n*-Bu-TMG/[bmim][BF<sub>4</sub>] (1/1) + CO<sub>2</sub> system in CDCl<sub>3</sub> (red arrow: signal of carboxylate)

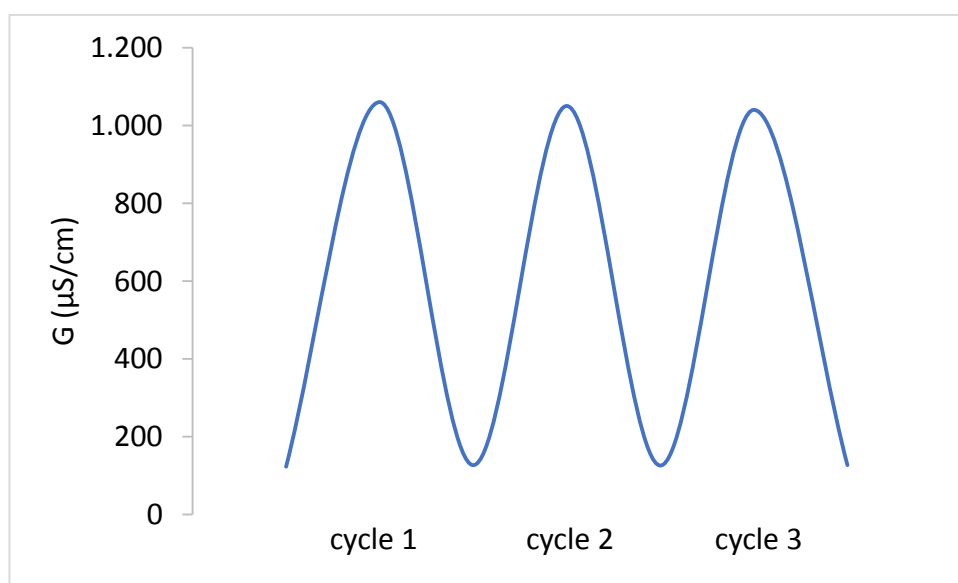

Figure S3. Monitoring the reversibility of the *n*-Bu-TMG /imidazole (**2a**) system by conductivity measurements

### Characterisation of the products

#### *16 $\alpha$ -(1H-Imidazol-1-yl)-3 $\beta$ -hydroxy-pregn-5-ene-20-one (3a) [5]*

Mp. 98-100°C;  $R_f$  = 0.29 (toluene/EtOAc, 1/1).  $[\alpha]_D^{20}$  = +12.4° (EtOH, c=0.5)

IR (KBr):  $\nu$  = 3460, 2924, 2849, 2359, 2342, 1701, 1541, 1232, 1049, 902  $\text{cm}^{-1}$ .

$^1\text{H}$  NMR (400 MHz,  $\text{CDCl}_3$ ):  $\delta$  = 7.55 (s, 1 H, 2'-H), 7.03 (s, 1 H, 5'-H), 6.90 (s, 1 H, 4'-H), 5.31-5.37 (m, 1 H, 6-H), 5.25 (ddd,  $J$  = 3.1 Hz, 8.1 Hz, 10.9 Hz, 1 H, 16-H), 3.49-3.59 (m, 1 H, 3-H), 2.77 (d,  $J$  = 8.1 Hz, 1 H, 17-H), 1.04-2.59 (m, 18 H, ring protons, OH), 2.09 (s, 3 H,  $\text{COCH}_3$ ), 1.02 (s, 3 H, 19- $\text{H}_3$ ), 0.72 (s, 3 H, 18- $\text{H}_3$ ).

$^{13}\text{C}$  NMR (101 MHz,  $\text{CDCl}_3$ ):  $\delta$  = 206.0, 141.2, 136.3, 129.6, 120.8, 116.9, 73.2, 71.6, 56.6, 55.8, 49.9, 45.31, 42.3, 38.8, 37.3, 36.6, 33.6, 31.8, 31.7, 31.6, 31.6, 20.9, 19.5, 14.1.

HRMS:  $m/z$  calcd for  $\text{C}_{24}\text{H}_{35}\text{N}_2\text{O}_2$   $[\text{M}+\text{H}]^+$  383.2699, found 383.2693.

#### *16 $\alpha$ -(1H-Pyrazol-1-yl)-3 $\beta$ -hydroxy-pregn-5-ene-20-one (3b)*

Mp. 148-150°C;  $R_f$  = 0.50 (toluene/EtOAc, 1/1).  $[\alpha]_D^{20}$  = +8.4° (EtOH, c=0.5)

$^1\text{H}$  NMR (400 MHz,  $\text{CDCl}_3$ ):  $\delta$  = 7.49 (d,  $J$  = 1.1 Hz, 1 H, 5'-H), 7.38-7.42 (d,  $J$  = 1.8 Hz, 1 H, 3'-H), 6.15 (d,  $J$  = 1.1 Hz, 1.8 Hz, 1 H, 4'-H), 5.24-5.34 (m, 2 H, 6-H, 16-H), 3.48-3.59 (m, 1 H, 3-H), 3.25 (d,  $J$  = 8.1 Hz, 1 H, 17-H), 1.05-2.34 (m, 18 H, ring protons, OH), 2.07 (s, 3 H,  $\text{COCH}_3$ ), 1.00 (s, 3 H, 19- $\text{H}_3$ ), 0.71 (s, 3 H, 18- $\text{H}_3$ ).

$^{13}\text{C}$  NMR (101 MHz,  $\text{CDCl}_3$ ):  $\delta$  = 207.3, 140.8, 140.0, 130.0, 121.2, 104.8, 71.6, 70.7, 60.1, 55.3, 49.7, 45.0, 42.3, 38.4, 37.3, 36.6, 33.0, 31.7, 31.58, 31.56, 31.5, 20.9, 19.5, 14.2.

IR (KBr):  $\nu$  = 3450, 2926, 2851, 2359, 2342, 1697, 1541, 1236, 1049, 962  $\text{cm}^{-1}$ .

HRMS:  $m/z$  calcd for  $\text{C}_{24}\text{H}_{34}\text{N}_2\text{O}_2\text{Na}$   $[\text{M}+\text{Na}]^+$  405.2518, found 405.2515.

#### *16 $\alpha$ -(1H-1,2,4-Triazol-1-yl)-3 $\beta$ -hydroxy-pregn-5-ene-20-one (3c)*

Mp. 97-100°C;  $R_f$  = 0.30 (toluene/MeOH, 1/1).  $[\alpha]_D^{20}$  = +2.4° (EtOH, c=0.3)

$^1\text{H}$  NMR (400 MHz,  $\text{CDCl}_3$ ):  $\delta$ = 8.04 (s, 1 H, 5'-H), 7.89 (s, 1 H, 3'-H), 5.42 (ddd,  $J$ =2.7 Hz, 8.0 Hz, 9.7 Hz, 1 H, 16-H), 5.28-5.35 (m, 1 H, 6-H), 3.48-3.59 (m, 1 H, 3-H), 3.12 (d,  $J$ =8.0 Hz, 1 H, 17-H), 1.03-2.33 (m, 18 H, ring protons, OH), 2.09 (s, 3 H,  $\text{COCH}_3$ ), 1.00 (s, 3 H, 19- $\text{H}_3$ ), 0.72 (s, 3 H, 18- $\text{H}_3$ ).

$^{13}\text{C}$  NMR (101 MHz,  $\text{CDCl}_3$ ):  $\delta$ = 206.5, 152.4, 143.3, 140.9, 121.1, 71.6, 70.7, 57.9, 55.4, 49.7, 45.1, 42.2, 38.4, 37.3, 36.6, 32.6, 31.63, 31.57, 31.5, 31.3, 20.9, 19.5, 14.1.

IR (KBr):  $\nu$ = 3456, 2932, 2855, 2359, 2342, 1701, 1541, 1275, 1049, 910  $\text{cm}^{-1}$ .

HRMS:  $m/z$  calcd for  $\text{C}_{23}\text{H}_{33}\text{N}_3\text{O}_2\text{Na}$   $[\text{M}+\text{Na}]^+$  406.2470, found 406.2470.

***16 $\alpha$ -(1H-1,2,3-Triazol-1-yl)-3 $\beta$ -hydroxy-pregn-5-ene-20-one (3d)***

Mp. 144-146°C;  $R_f$ = 0.45 (toluene/MeOH, 3/1).  $[\alpha]_D^{20}$ = -13.9° (EtOH,  $c$ =0.5)

$^1\text{H}$  NMR (400 MHz,  $\text{CDCl}_3$ ):  $\delta$ = 7.55 (brs, 2 H, 4'-H, 5'-H), 5.70 (ddd,  $J$ =2.6 Hz, 8.1 Hz, 10.2 Hz, 1 H, 16-H), 5.31-5.36 (m, 1 H, 6-H), 3.48-3.58 (m, 1 H, 3-H), 3.39 (d,  $J$ =8.1 Hz, 1 H, 17-H), 1.05-2.34 (m, 18 H, ring protons, OH), 2.15 (s, 3 H,  $\text{COCH}_3$ ), 1.02 (s, 3 H, 19- $\text{H}_3$ ), 0.77 (s, 3 H, 18- $\text{H}_3$ ).

$^{13}\text{C}$  NMR (101 MHz,  $\text{CDCl}_3$ ):  $\delta$ = 206.4, 140.9, 134.1 (2C), 121.2, 71.7, 70.1, 63.8, 55.1, 49.9, 45.1, 42.3, 38.6, 37.3, 36.6, 33.1, 31.7, 31.62, 31.60 (2C), 20.9, 19.5, 14.3.

IR (KBr):  $\nu$ = 3456, 2953, 2850, 2358, 2342, 1705, 1539, 1234, 1043, 962  $\text{cm}^{-1}$ .

HRMS:  $m/z$  calcd for  $\text{C}_{23}\text{H}_{33}\text{N}_3\text{O}_2\text{Na}$   $[\text{M}+\text{Na}]^+$  406.2470, found . 406.2467

***16 $\alpha$ -(1H-Benzimidazol-1-yl)-3 $\beta$ -hydroxy-pregn-5-ene-20-one (3e)***

Mp. 127-129°C;  $R_f$ = 0.45 (toluene/MeOH, 3/1).  $[\alpha]_D^{20}$ = +10.1° (EtOH,  $c$ =0.5)

$^1\text{H}$  NMR (400 MHz,  $\text{CDCl}_3$ ):  $\delta$ = 8.06 (s, 1 H, 2'-H), 7.76-7.81 (m, 1 H, Ar-H), 7.48-7.54 (m, 1 H, Ar-H), 7.25-7.30 (m, 2 H, Ar-H), 5.58 (ddd,  $J$ =3.7 Hz, 8.6 Hz, 12.1 Hz, 1 H, 16-H), 5.32-

5.38 (m, 1 H, 6-H), 3.51-3.61 (m, 1 H, 3-H), 3.07 (d,  $J=8.6$  Hz, 1 H, 17-H), 0.87-2.48 (m, 18 H, ring protons, OH), 2.06 (s, 3 H, COCH<sub>3</sub>), 1.05 (s, 3 H, H<sub>3</sub>19-H<sub>3</sub>), 0.80 (s, 3 H, 18-H<sub>3</sub>).

<sup>13</sup>C NMR (101 MHz, CDCl<sub>3</sub>):  $\delta$ = 206.2, 143.6, 142.1, 141.2, 132.9, 123.2, 122.5, 120.8, 120.4, 110.7, 71.7, 70.8, 56.8, 54.8, 49.9, 45.5, 42.3, 38.8, 37.3, 36.7, 32.3, 31.81, 31.77, 31.65 (2C), 20.9, 19.5, 14.0.

IR (KBr):  $\nu$ = 3453, 2926, 2851, 2359, 2332, 1715, 1541, 1233, 1049, 800 cm<sup>-1</sup>.

HRMS:  $m/z$  calcd for C<sub>28</sub>H<sub>37</sub>N<sub>2</sub>O<sub>2</sub> [M+H]<sup>+</sup> 433.2855, found 433.2843 .

***16a-(1H-Indazol-1-yl)-3 $\beta$ -hydroxy-pregn-5-ene-20-one (3f)***

Mp. 201-203°C; R<sub>f</sub>= 0.47 (toluene/EtOAc, 1:1).  $[\alpha]_D^{20}$ = +59.7° (EtOH, c=0.5)

<sup>1</sup>H NMR (400 MHz, CDCl<sub>3</sub>):  $\delta$ = 8.00 (brs, 1 H, 3'-H), 7.65-7.67 (m, 1 H, Ar-H), 7.59-7.61 (m, 1 H, Ar-H), 7.33-7.39 (m, 1 H, Ar-H), 7.07-7.13 (m, 1 H, Ar-H), 5.75 (ddd,  $J=2.4$  Hz, 7.9 Hz, 9.8 Hz, 1 H, 16-H), 5.31-5.37 (m, 1 H, 6-H), 3.50-3.61 (m, 1 H, 3-H), 3.43 (d,  $J=7.9$  Hz, 1 H, 17-H), 0.86-2.40 (m, 18 H, ring protons, OH), 2.06 (s, 3 H, COCH<sub>3</sub>), 1.04 (s, 3 H, 19-H<sub>3</sub>), 0.82 (s, 3 H, 18-H<sub>3</sub>).

<sup>13</sup>C NMR (101 MHz, CDCl<sub>3</sub>):  $\delta$ = 207.6, 140.8, 139.9, 133.7, 126.3, 123.8, 121.4, 120.8, 120.7, 109.9, 71.8, 70.6, 56.4, 55.6, 49.8, 45.2, 42.4, 38.6, 37.4, 36.7, 33.3, 31.8, 31.70 (2C), 31.6, 21.0, 19.5, 14.4.

IR (KBr):  $\nu$ = 3455, 2926, 2851, 2357, 2342, 1701, 1541, 1223, 1049, 906 cm<sup>-1</sup>.

HRMS:  $m/z$  calcd for C<sub>28</sub>H<sub>36</sub>N<sub>2</sub>O<sub>2</sub>Na [M+Na]<sup>+</sup> 455.2674, found . 455.2676

***16a-(1H-Indol-1-yl)-3 $\beta$ -hydroxy-pregn-5-ene-20-one (3g)***

Mp. 183-185°C; R<sub>f</sub>= 0.51 (toluene/MeOH, 3/1).

<sup>1</sup>H NMR (400 MHz, CDCl<sub>3</sub>):  $\delta$ = 7.57-7.59 (m, 1 H, Ar-H), 7.50-7.52 (m, 1 H, Ar-H), 7.17-7.21 (m, 1 H, Ar-H), 7.15-7.16 (m, 1 H, Ar-H), 7.05-7.09 (m, 1 H, Ar-H), 6.50-6.51 (m, 1 H,



Ar-H), 5.60 (ddd,  $J=5.0$  Hz, 8.2 Hz, 13.3 Hz, 1 H, 16-H), 5.34-5.40 (m, 1 H, 6-H), 3.51-3.61 (m, 1 H, 3-H), 3.01 (d,  $J=8.2$  Hz, 1 H, 17-H), 1.09-2.39 (m, 18 H, ring protons, OH), 2.03 (s, 3 H, COCH<sub>3</sub>), 1.05 (s, 3 H, 19-H<sub>3</sub>), 0.81 (s, 3 H, 18-H<sub>3</sub>).

<sup>13</sup>C NMR (101 MHz, CDCl<sub>3</sub>):  $\delta$ = 206.7, 140.8, 135.6, 128.3, 124.5, 121.4, 120.8, 120.6, 119.2, 110.1, 102.0, 71.5, 71.3, 56.4, 54.6, 49.7, 45.0, 42.0, 38.6, 37.0, 36.4, 33.0, 31.7, 31.6, 31.5, 31.4, 20.6, 19.2, 14.00.

IR (KBr):  $\nu$ = 3461, 2912, 2852, 2359, 2342, 1691, 1541, 1229, 1060, 1010 cm<sup>-1</sup>.

HRMS:  $m/z$  calcd for C<sub>29</sub>H<sub>37</sub>NO<sub>2</sub>Na [M+Na]<sup>+</sup> 454.2722, found 454.2719.

**$^1\text{H}$ - and  $^{13}\text{C}$  NMR spectra of the products**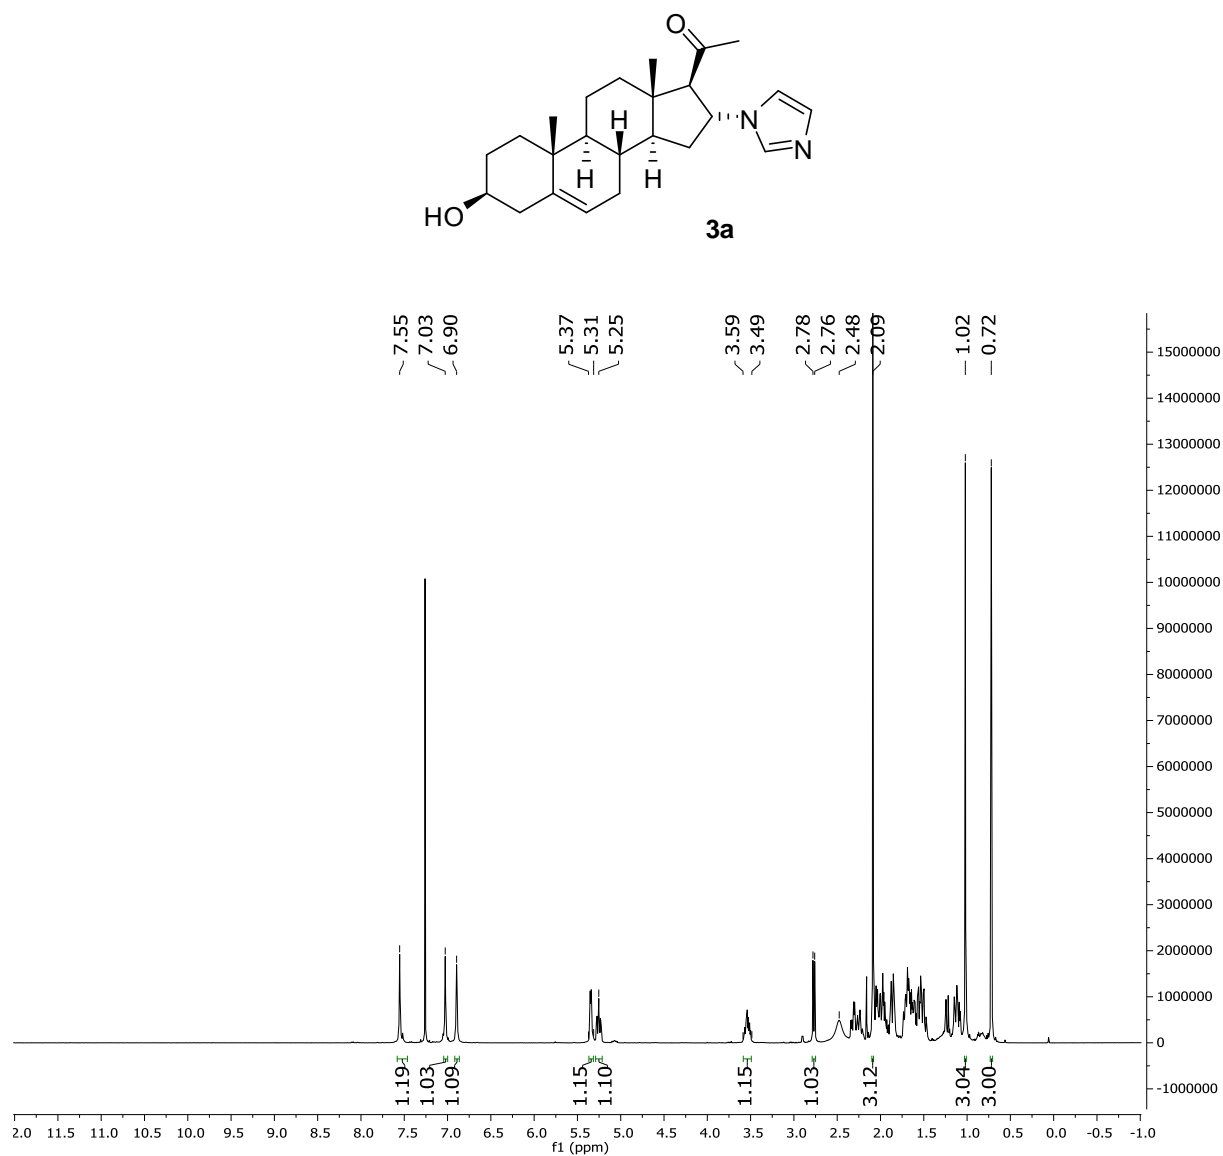

Figure S4  $^1\text{H}$  NMR spectrum of 16 $\alpha$ -(1*H*-imidazol-1-yl)-3 $\beta$ -hydroxy-pregn-5-ene-20-one (**3a**) in  $\text{CDCl}_3$

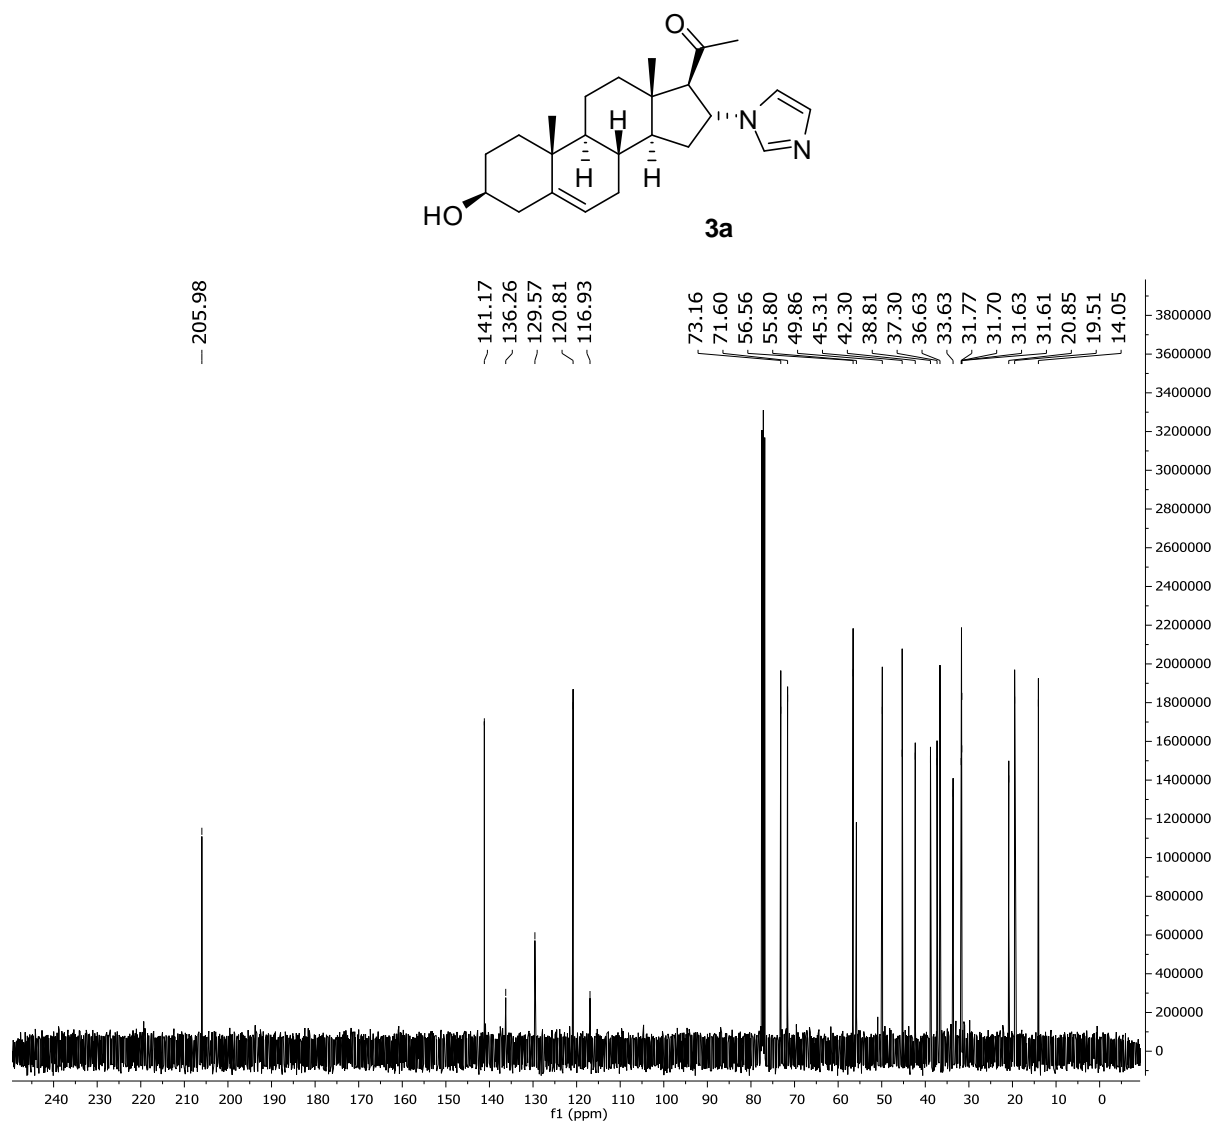

Figure S5  $^{13}\text{C}$  NMR spectrum of 16 $\alpha$ -(1*H*-imidazol-1-yl)-3 $\beta$ -hydroxy-pregn-5-ene-20-one (**3a**) in  $\text{CDCl}_3$

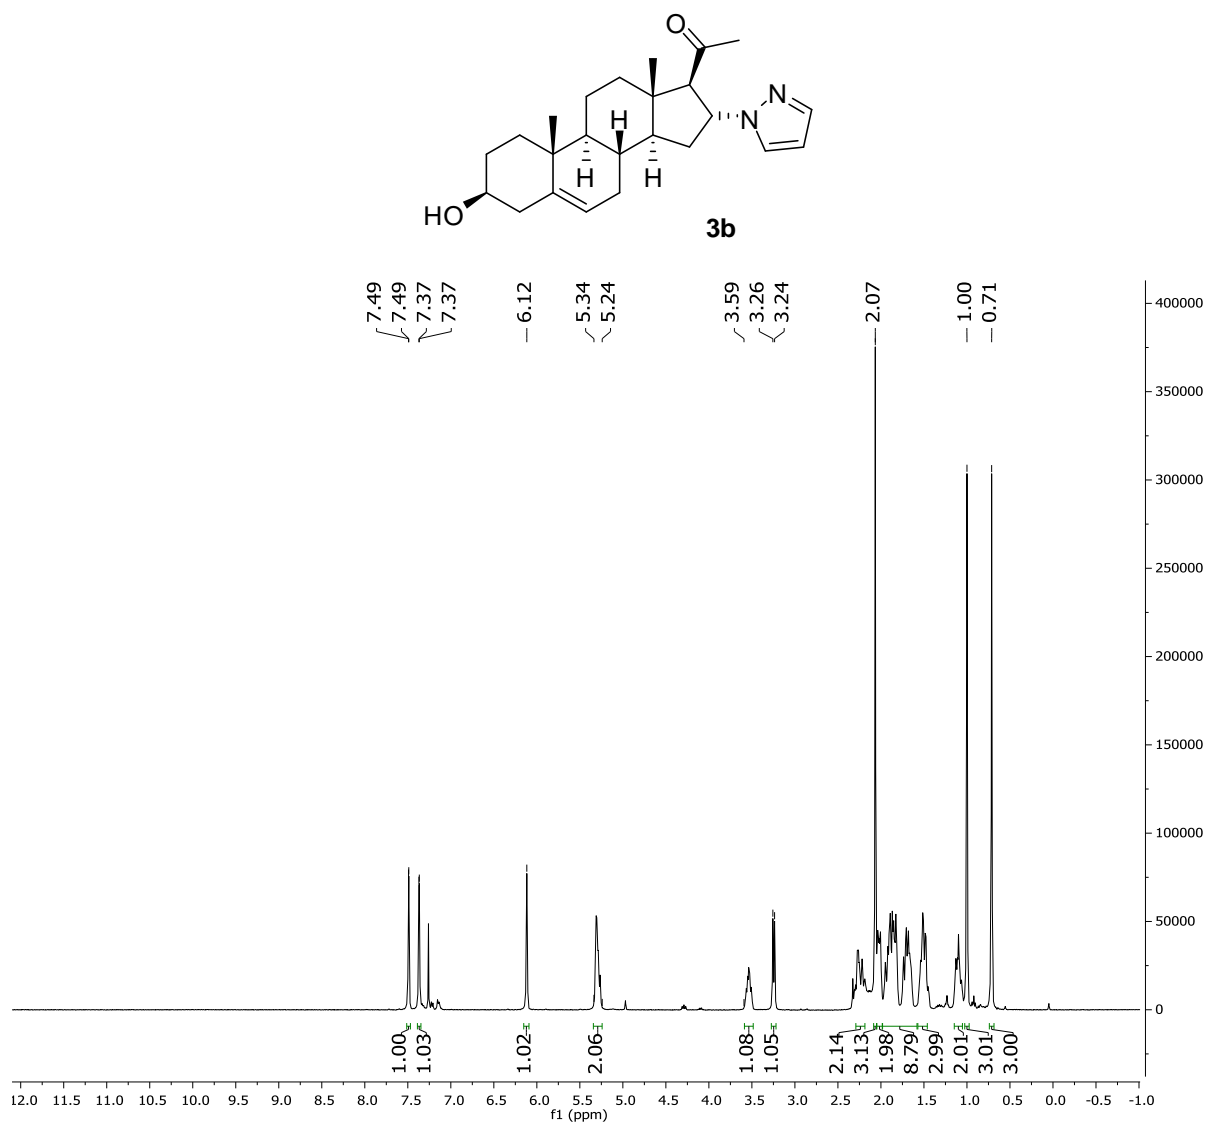

Figure S6 <sup>1</sup>H NMR spectrum of 16 $\alpha$ -(1*H*-pyrazol-1-yl)-3 $\beta$ -hydroxy-pregn-5-ene-20-one (**3b**) in CDCl<sub>3</sub>

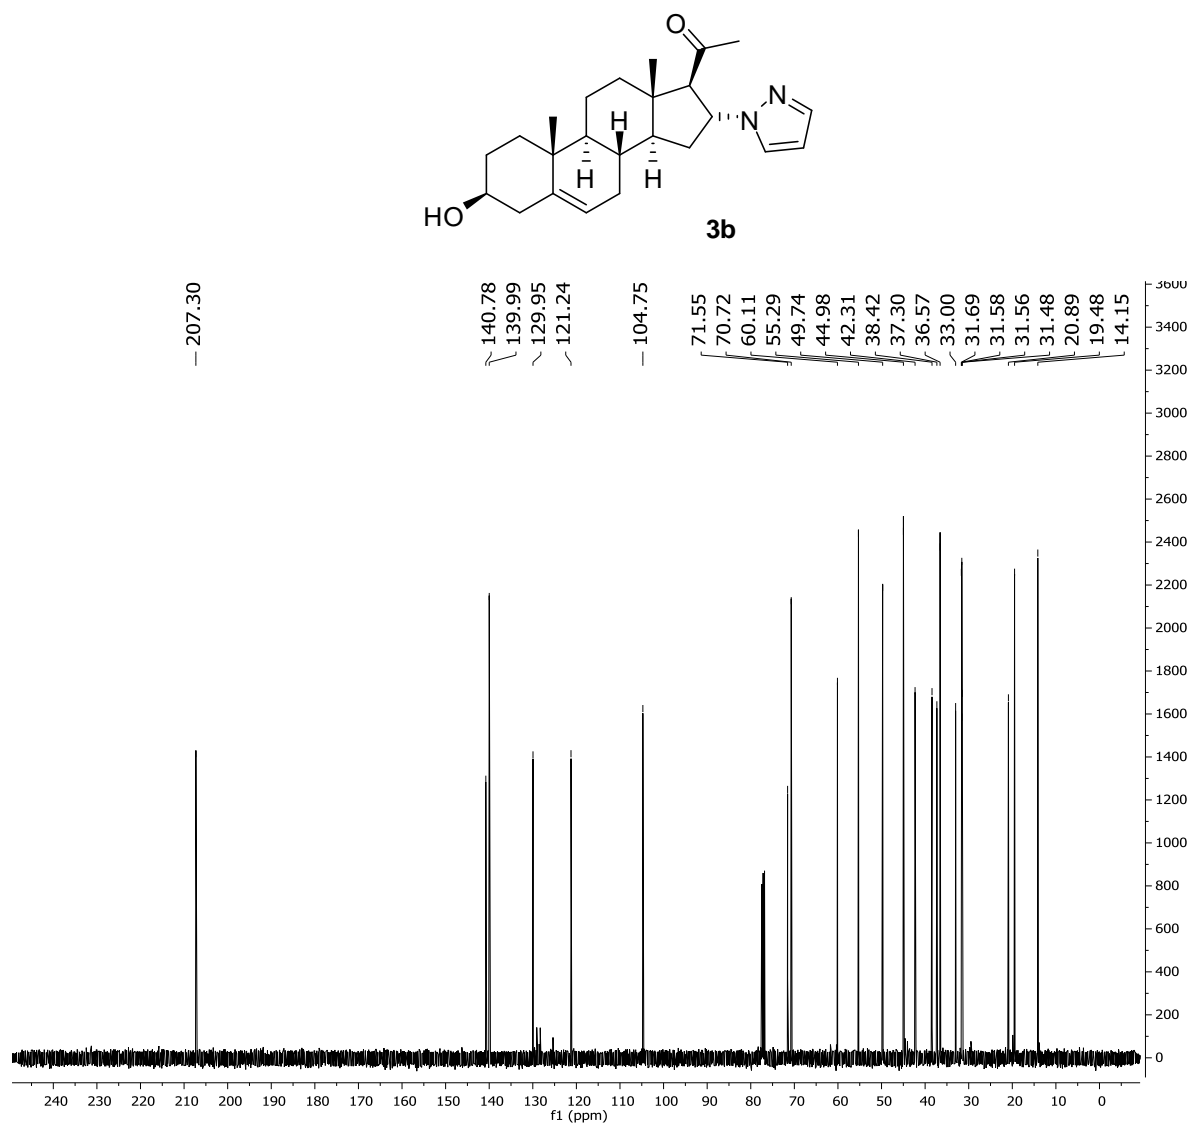

Figure S7 <sup>13</sup>C NMR spectrum of 16 $\alpha$ -(1*H*-pyrazol-1-yl)-3 $\beta$ -hydroxy-pregn-5-ene-20-one (**3b**) in CDCl<sub>3</sub>

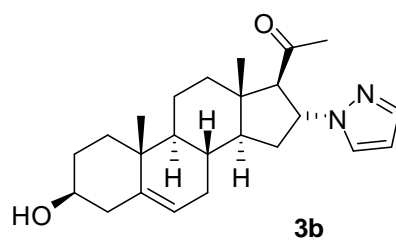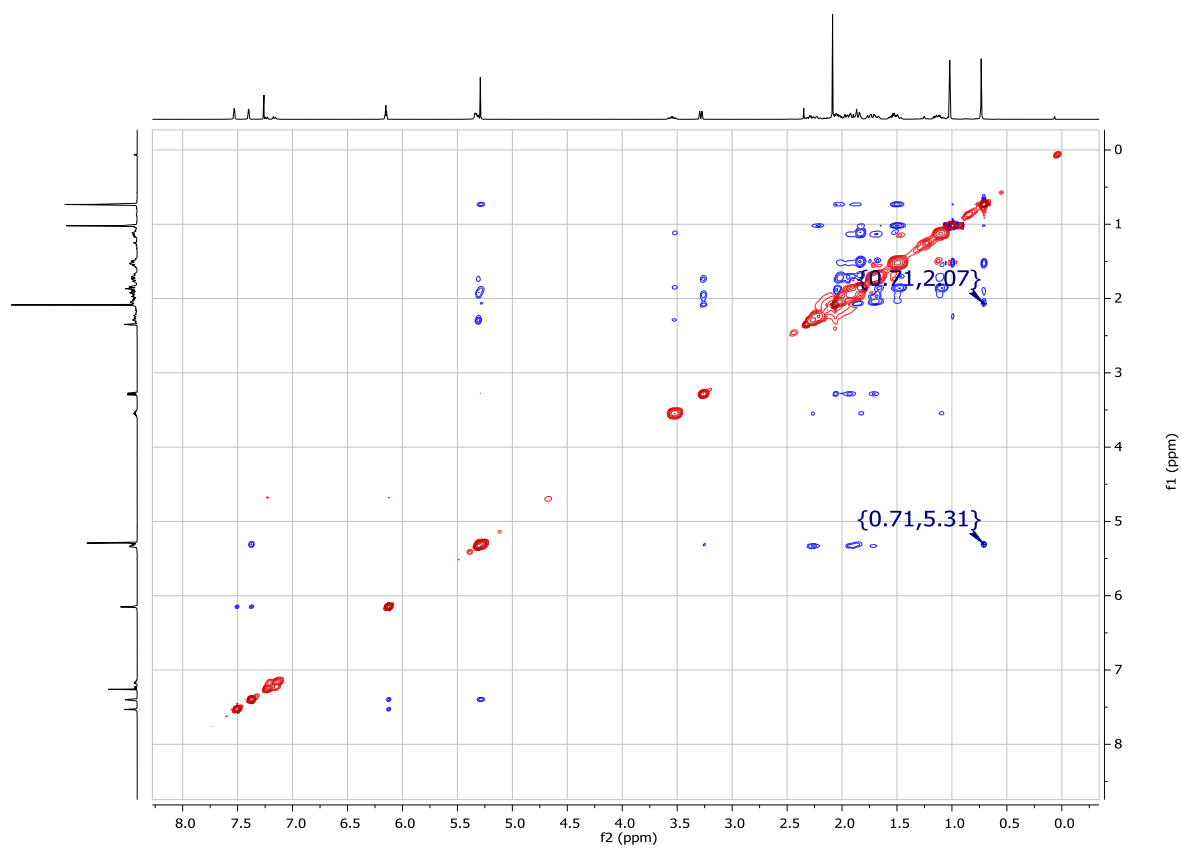

Figure S8 NOESY spectrum of 16 $\alpha$ -(1*H*-pyrazol-1-yl)-3 $\beta$ -hydroxy-pregn-5-ene-20-one (**3b**) in CDCl<sub>3</sub>

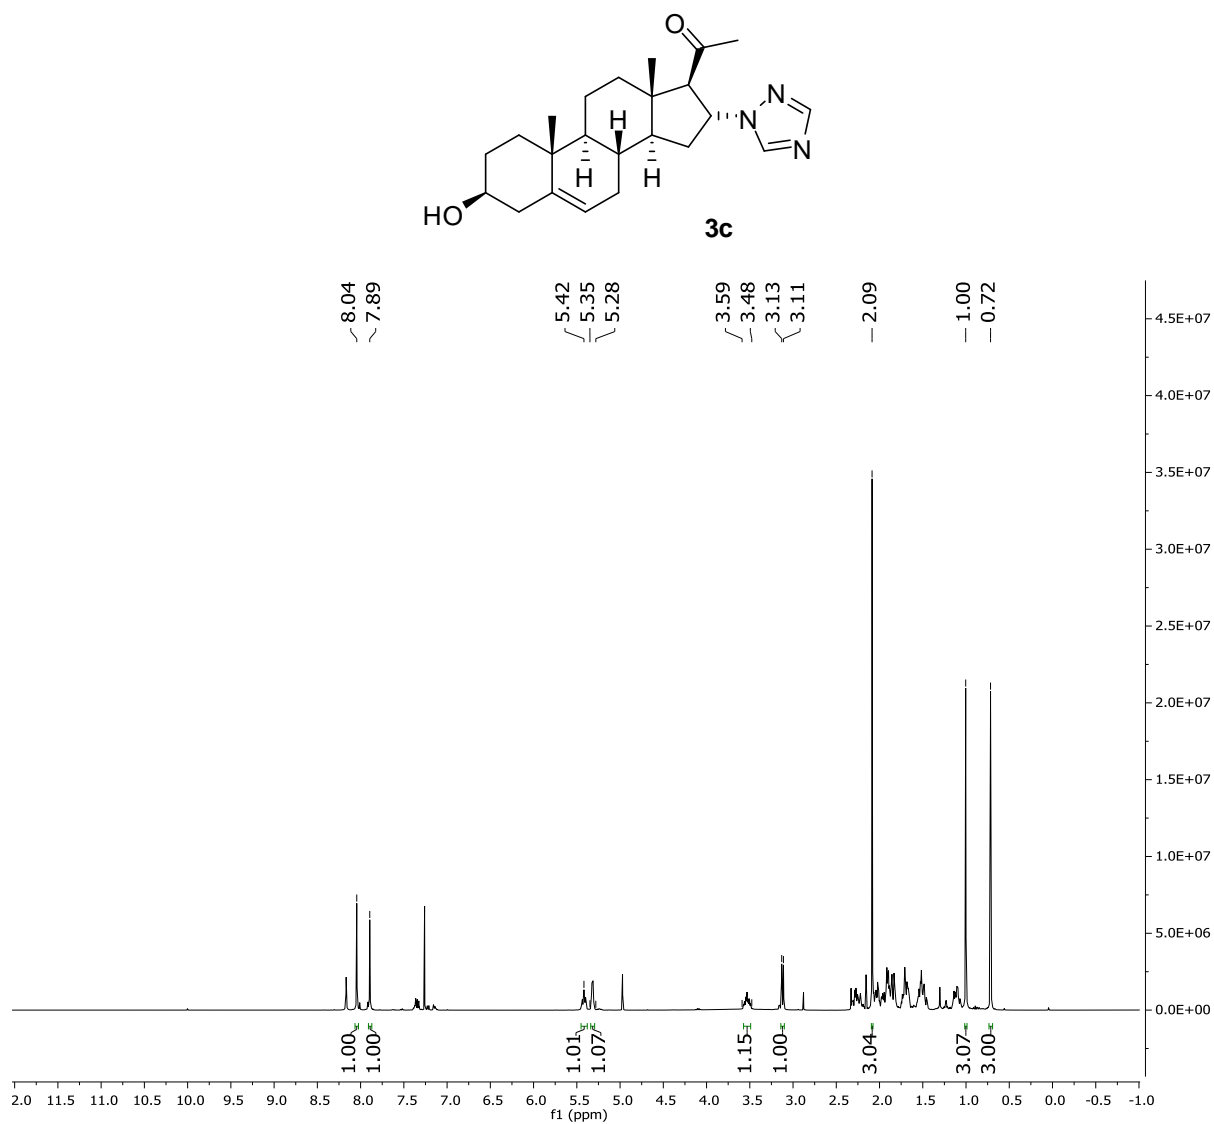

Figure S9 <sup>1</sup>H NMR spectrum of 16 $\alpha$ -(1H-1,2,4-triazol-1-yl)-3 $\beta$ -hydroxy-pregn-5-ene-20-one (**3c**) in CDCl<sub>3</sub>

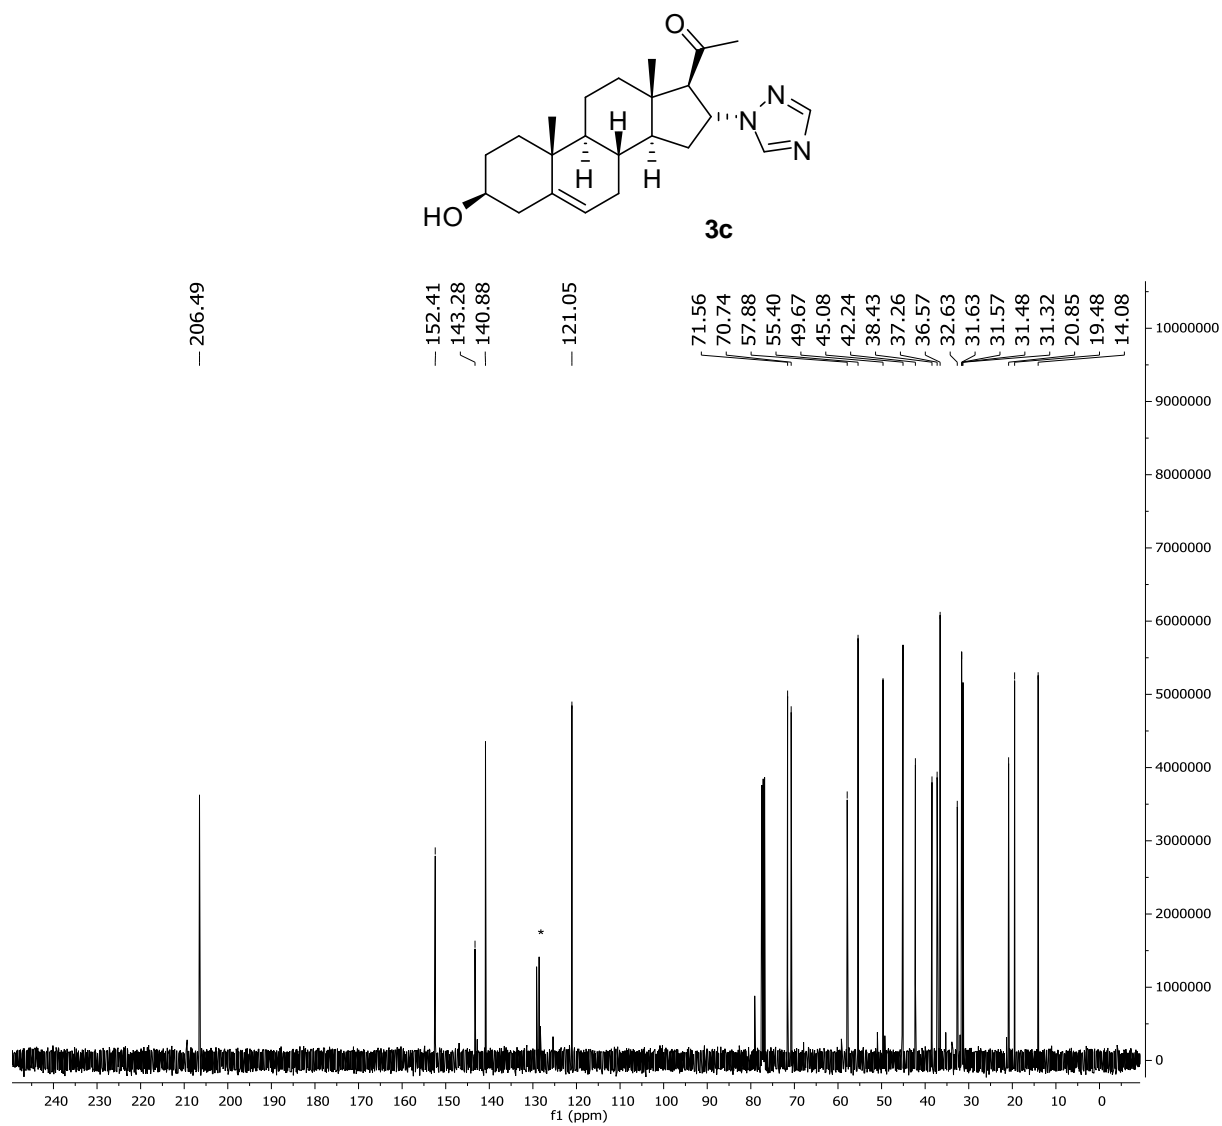

Figure S10  $^{13}\text{C}$  NMR spectrum of 16 $\alpha$ -(1H-1,2,4-triazol-1-yl)-3 $\beta$ -hydroxy-pregn-5-ene-20-one (**3c**) in  $\text{CDCl}_3$  (\*: toluene)



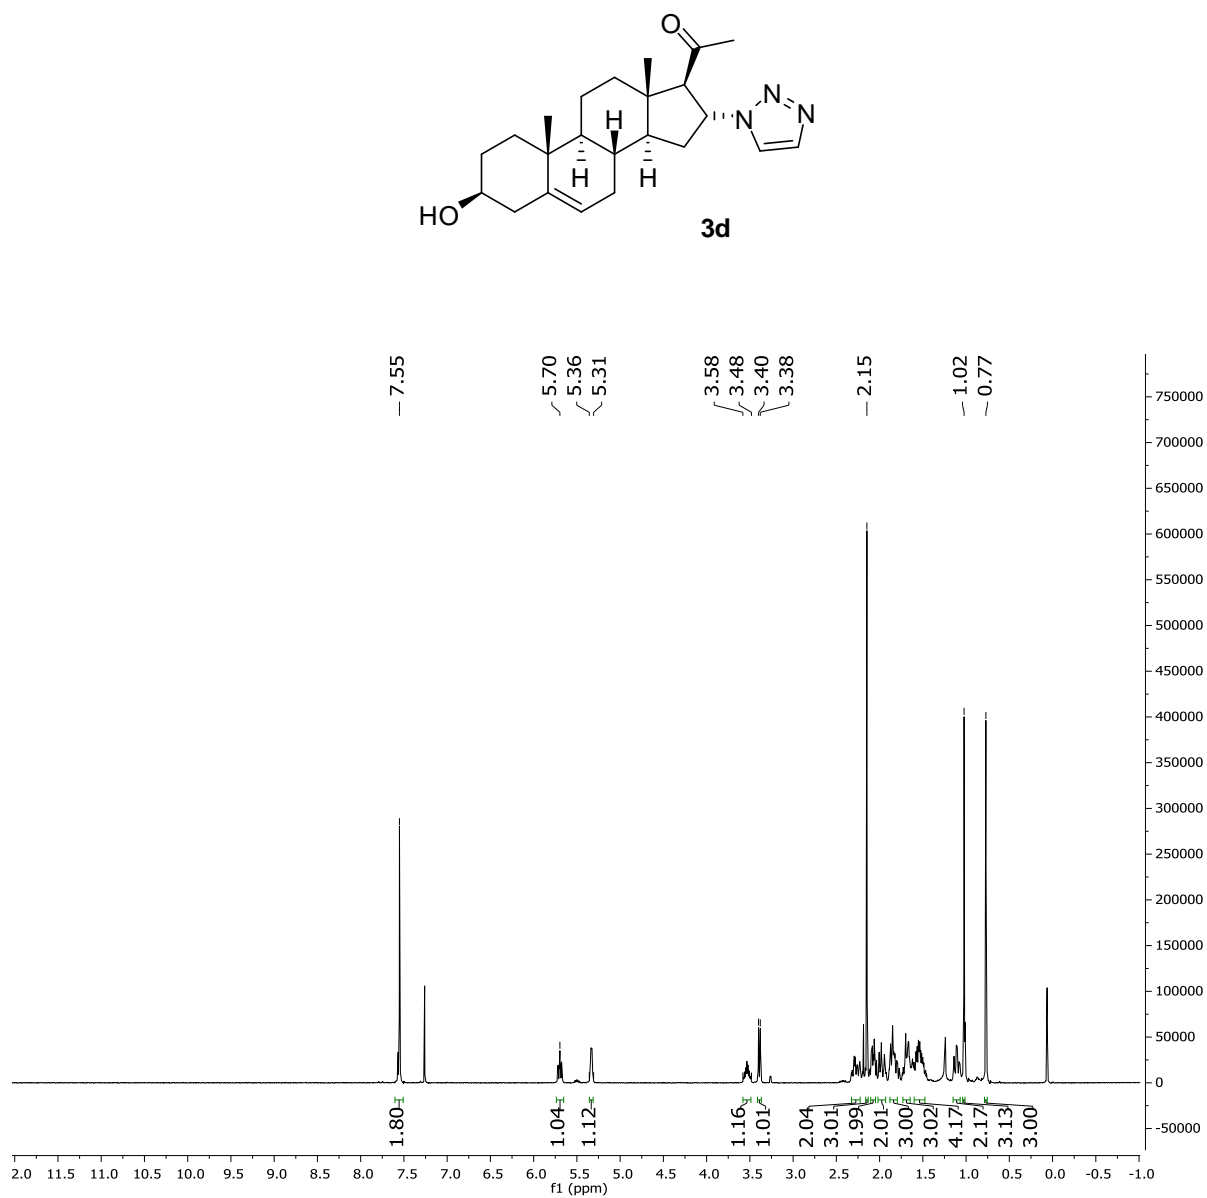

Figure S11  $^1\text{H}$  NMR spectrum of 16 $\alpha$ -(1H-1,2,3-triazol-1-yl)-3 $\beta$ -hydroxy-pregn-5-ene-20-one (**3d**) in  $\text{CDCl}_3$

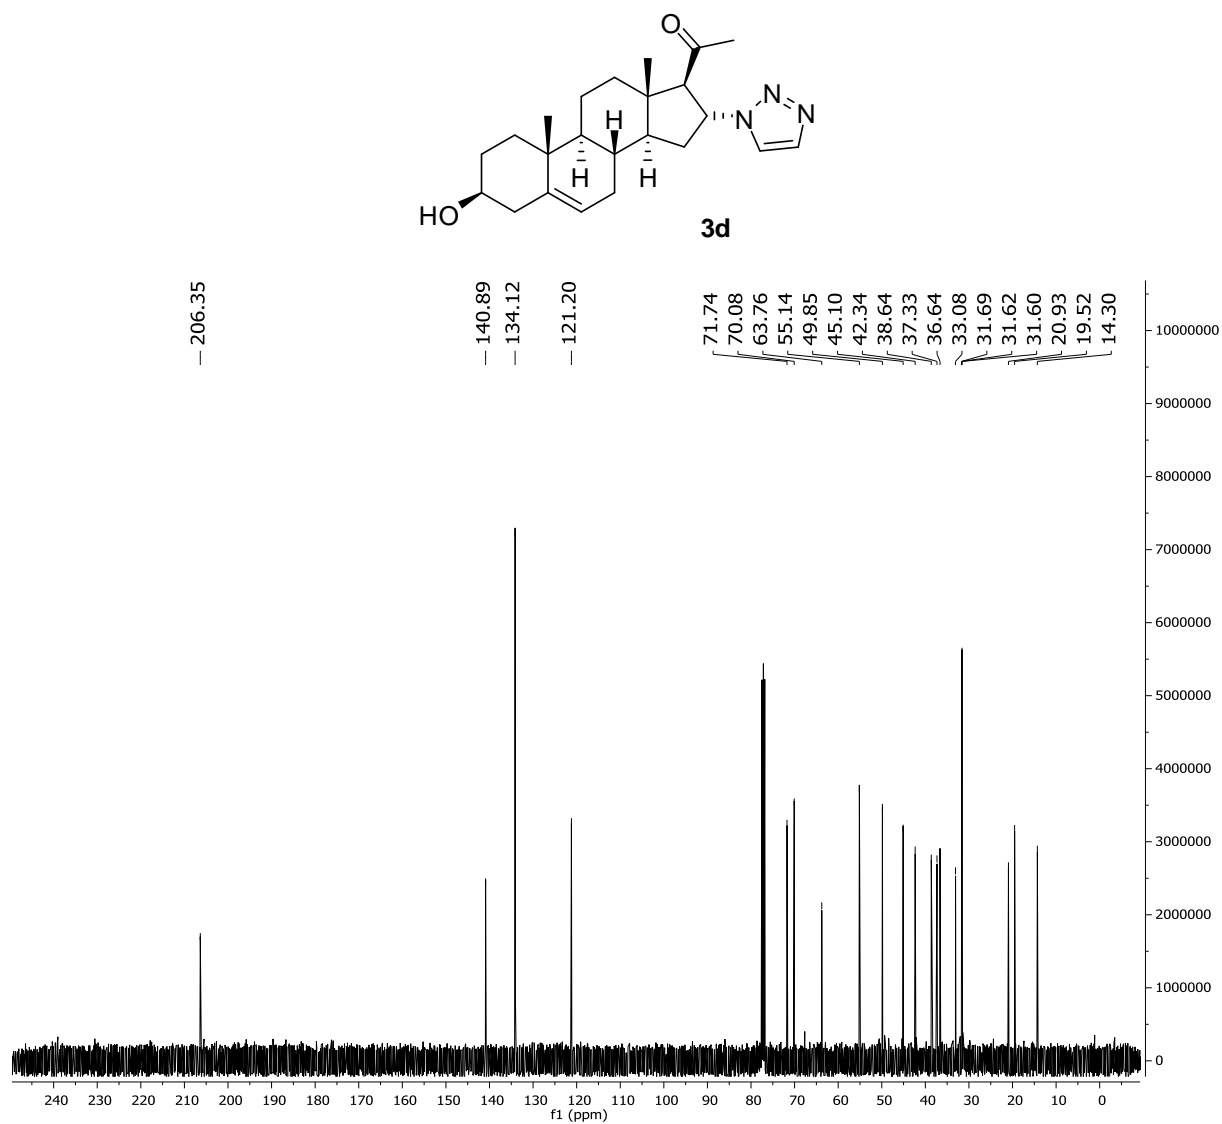

Figure S12  $^{13}\text{C}$  NMR spectrum of 16 $\alpha$ -(1*H*-1,2,3-triazol-1-yl)-3 $\beta$ -hydroxy-pregn-5-ene-20-one (**3d**) in  $\text{CDCl}_3$

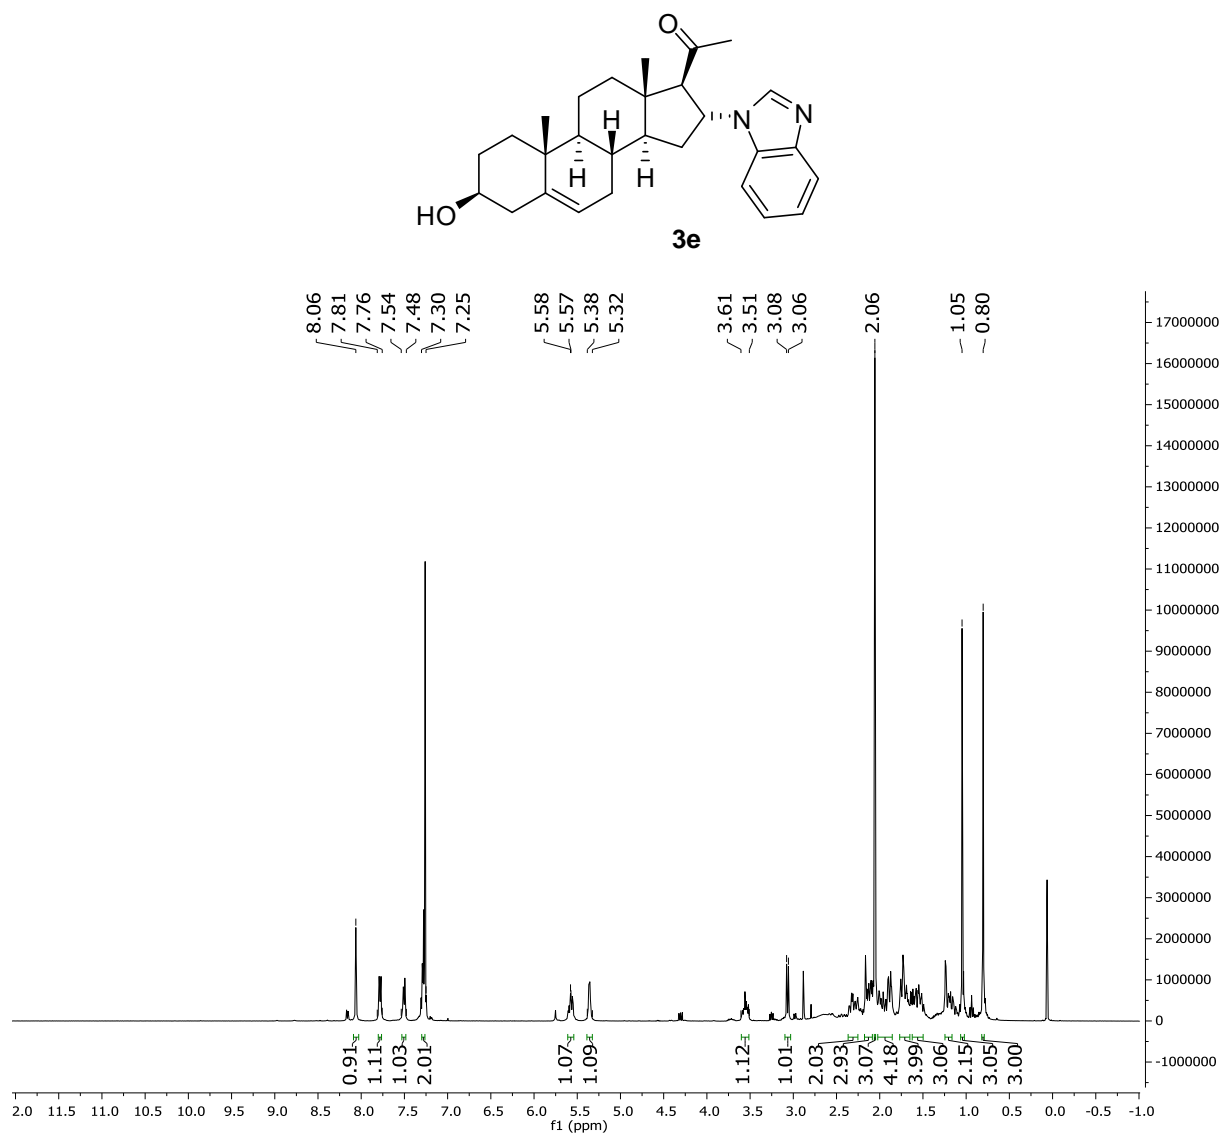

Figure S13  $^1\text{H}$  NMR spectrum of 16 $\alpha$ -(1*H*-benzimidazol-1-yl)-3 $\beta$ -hydroxy-pregn-5-ene-20-one (**3e**) in  $\text{CDCl}_3$

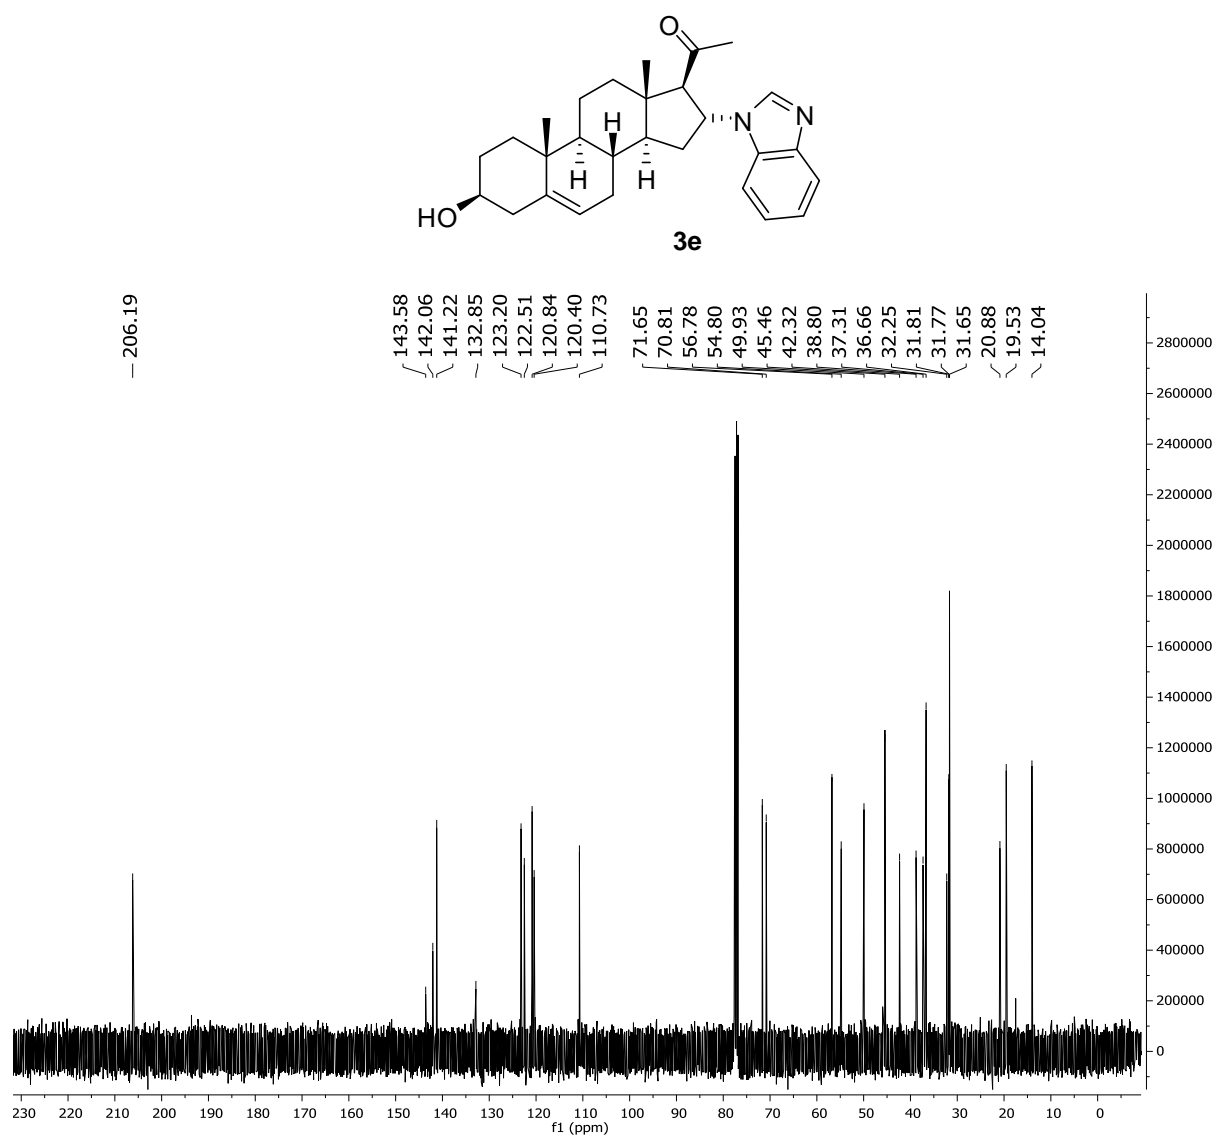

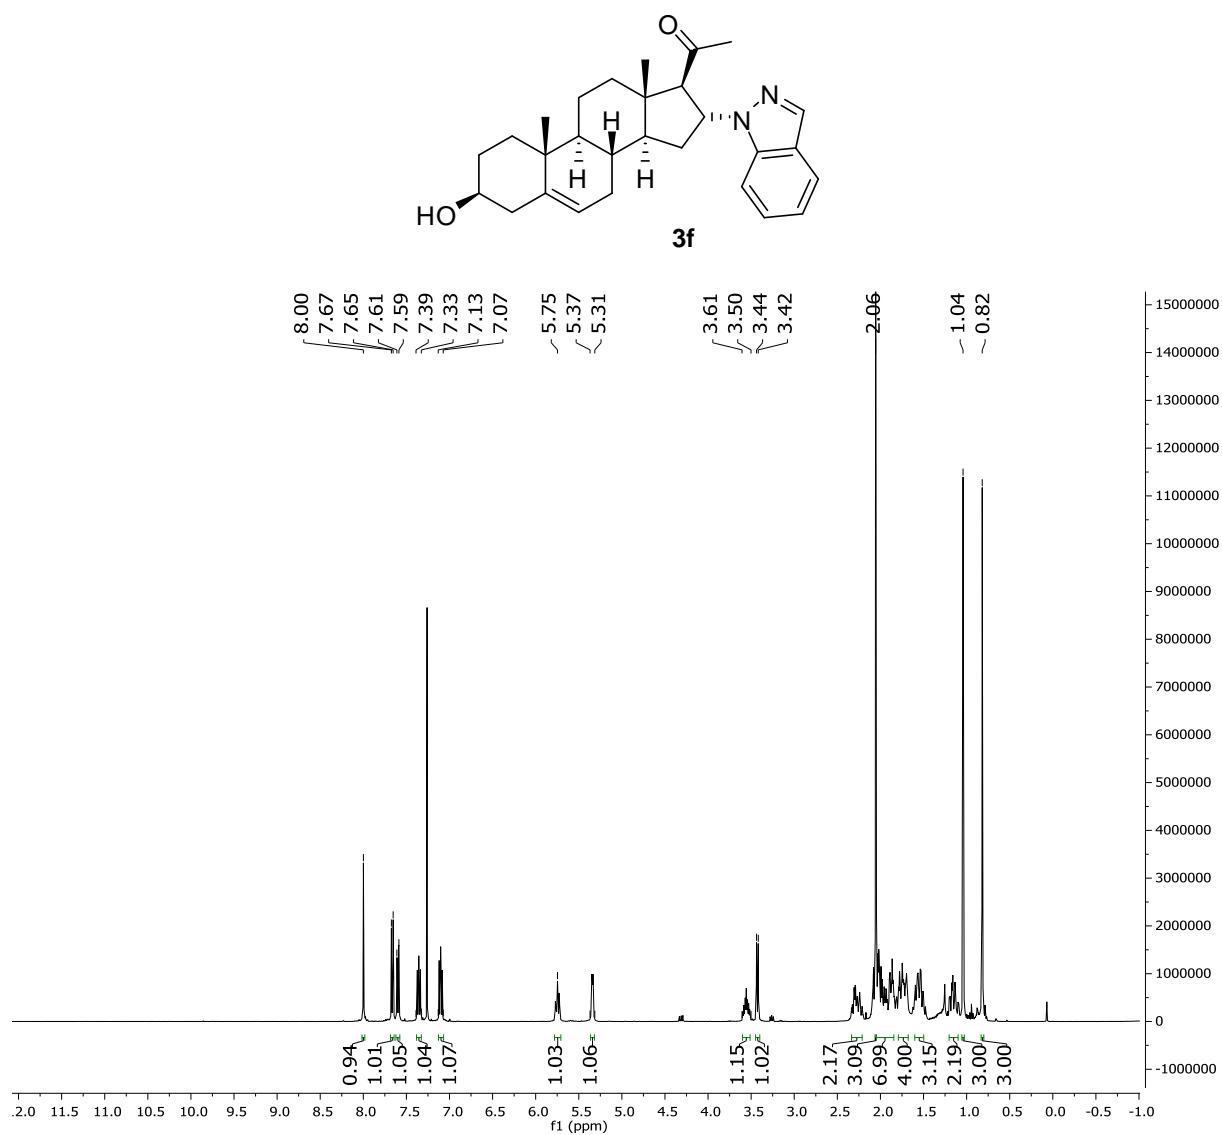

Figure S15 <sup>1</sup>H NMR spectrum of 16 $\alpha$ -(1H-indazol-1-yl)-3 $\beta$ -hydroxy-pregn-5-ene-20-one (**3f**) in CDCl<sub>3</sub>

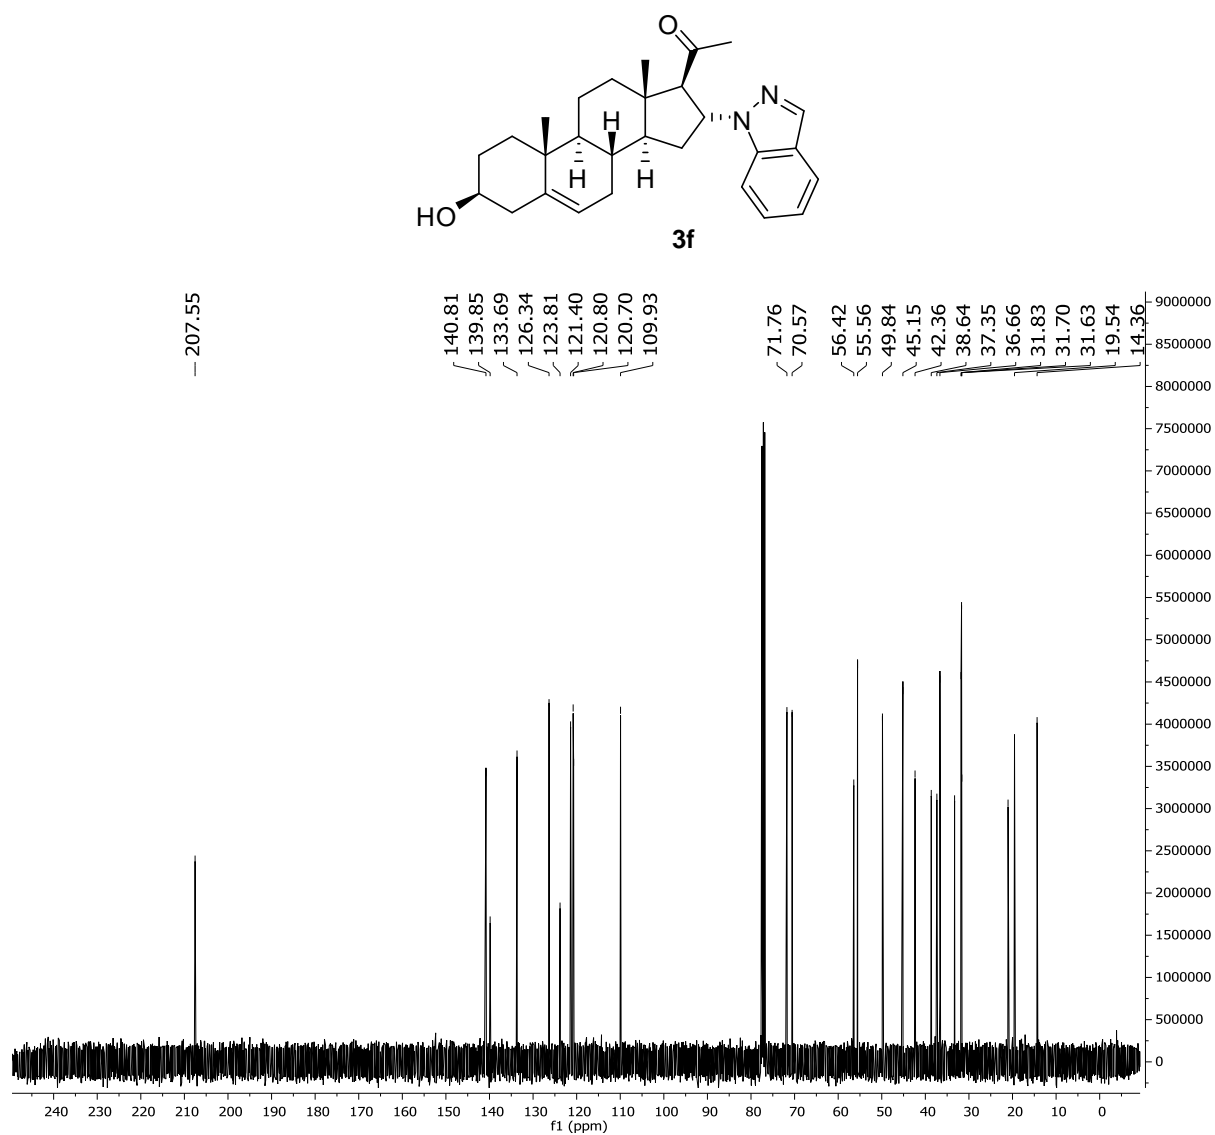

Figure S16  $^{13}\text{C}$  NMR spectrum of 16 $\alpha$ -(1*H*-indazol-1-yl)-3 $\beta$ -hydroxy-pregn-5-ene-20-one (**3f**) in CDCl<sub>3</sub>

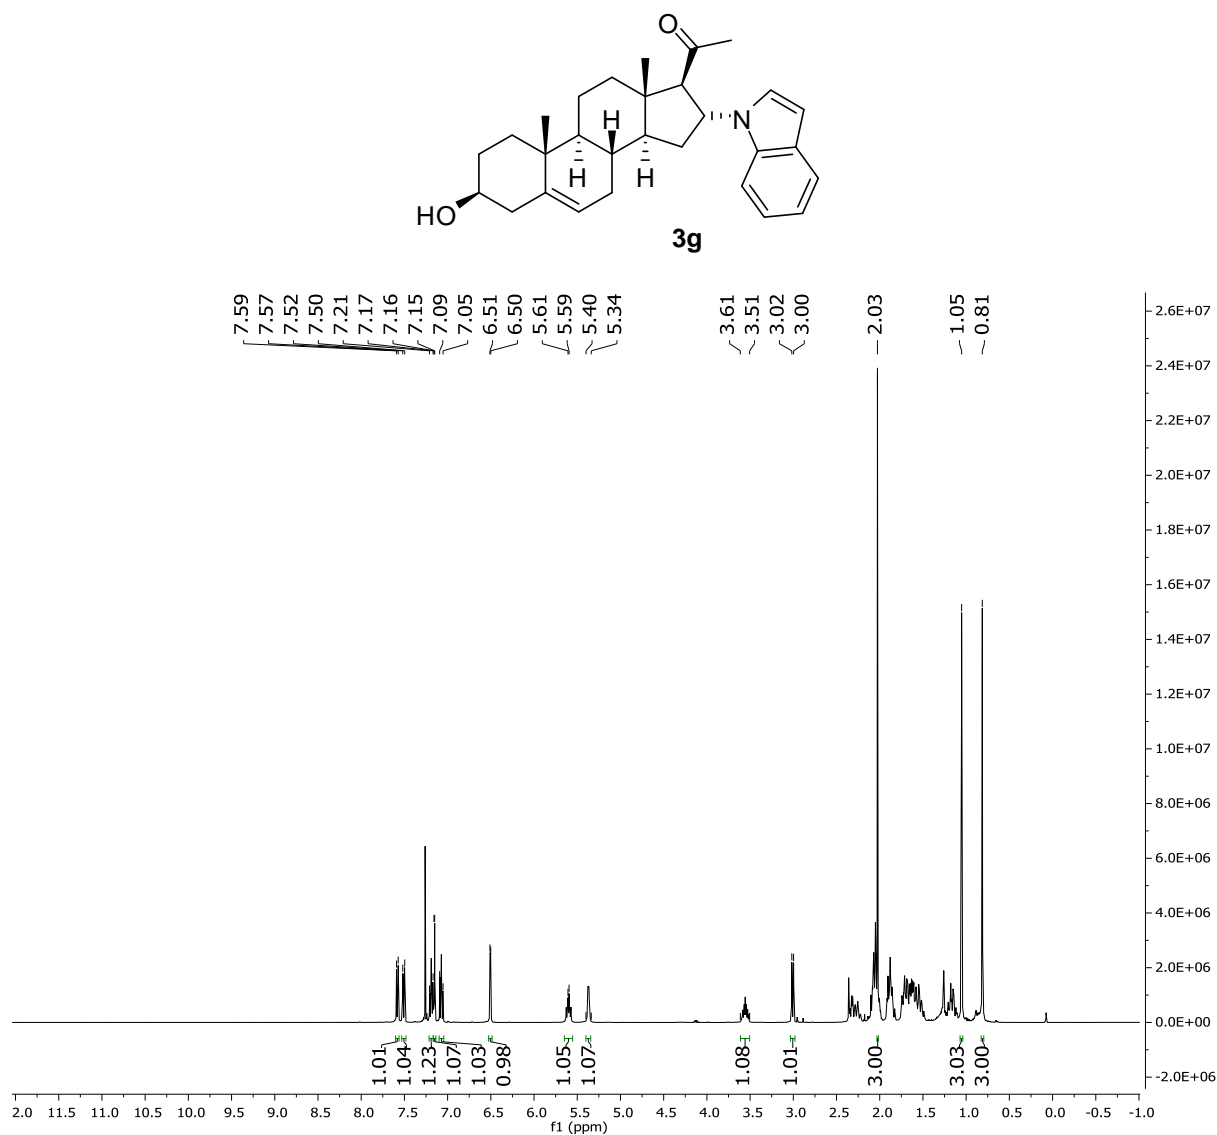

Figure S17  $^1\text{H}$  NMR spectrum of 16 $\alpha$ -(1*H*-indol-1-yl)-3 $\beta$ -hydroxy-pregn-5-ene-20-one (**3g**) in  $\text{CDCl}_3$

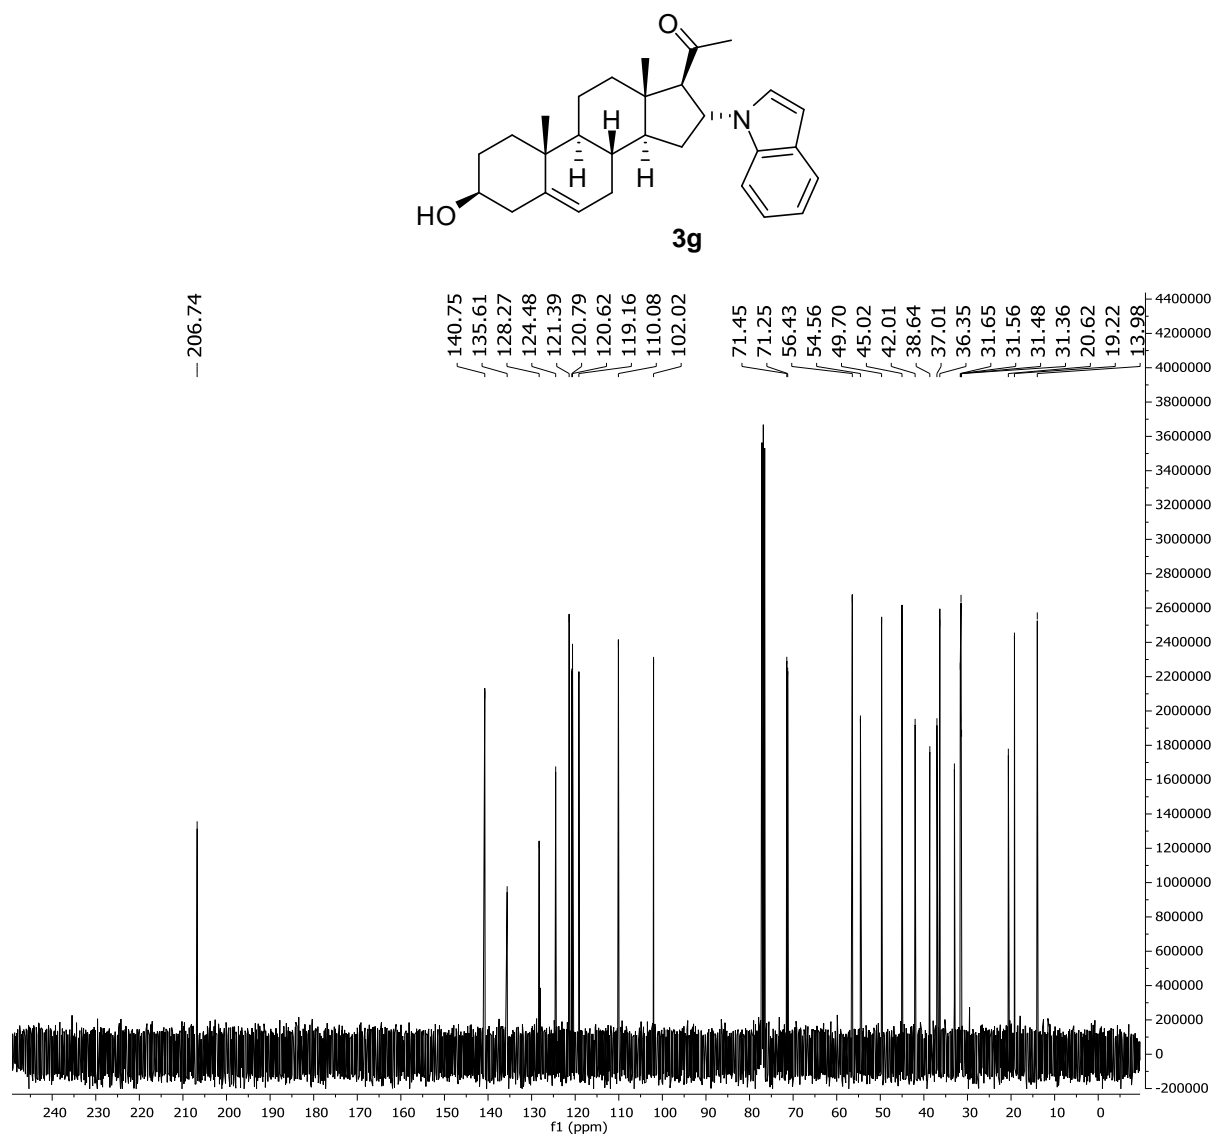

Figure S18  $^{13}\text{C}$  NMR spectrum of 16 $\alpha$ -(1*H*-indol-1-yl)-3 $\beta$ -hydroxy-pregn-5-ene-20-one (**3g**) in  $\text{CDCl}_3$



## References

- 1 S. Tshepelevitsh, A. Kütt, M. Lõkov, I. Kaljurand, J. Saame, A. Heering and I. Leito, *Eur. J. Org. Chem.*, 2019, 6735-6748.
- 2 D. H. R. Barton, J. D. Elliott and S. D. Gdro, *J. Chem. Soc. Perkin Trans. I* 1982, 2085-2090.
- 3 J. Catalan and J. Elguero, *Adv. Heterocycl. Chem.* 1987, **41**, 187–274.
- 4 Mayr's database: <https://www.cup.lmu.de/oc/mayr/reaktionsdatenbank2> (accessed October 2023)
- 5 E. Szánti-Pintér, L. Maksó, Á. Gömör, J. Wouters, B. E. Herman, M. Szécsi, G. Mikle, L. Kollár and R. Skoda-Földes, *Steroids*, 2017, **123**, 61-66.
